# Supplementary material
Source: PubMed Central journal article supplement (PMC8899598)
Supplement: mmc1.pdf [file mmc1.pdf]

YMTHE, Volume 30

## **Supplemental Information**

**The long non-coding RNA *NRON*  
promotes the development of cardiac  
hypertrophy in the murine heart**

**Jeannine Hoepfner, Julia Leonardy, Dongchao Lu, Kevin Schmidt, Hannah J. Hunkler, Sinje Biß, Ariana Foinquinos, Ke Xiao, Kumarswamy Regalla, Deepak Ramanujam, Stefan Engelhardt, Christian Bär, and Thomas Thum**

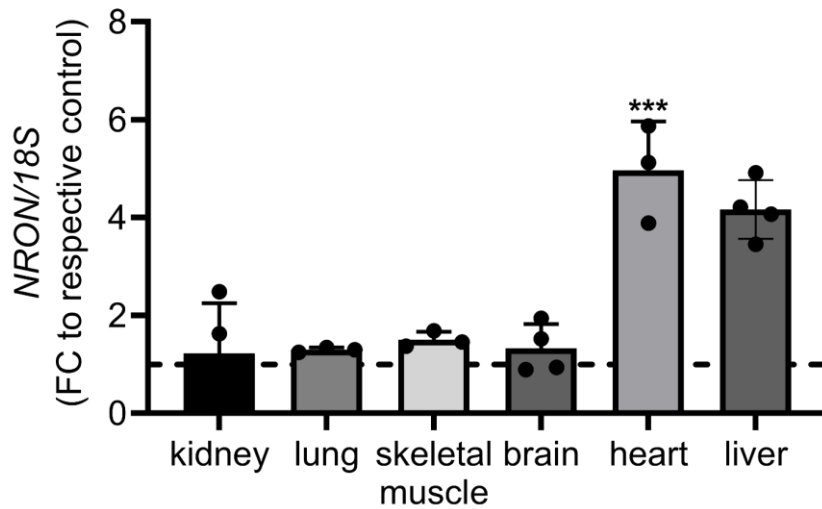

**Figure S1: *NRON* level in different organs after AAV9-*NRON* administration.**  $1.5 \times 10^{12}$  AAV9-*NRON* or AAV9-empty viral particles were injected. Mice were sacrificed after 6 weeks. *NRON* level was measured by qPCR relative to *18S* RNA. FC was calculated using *NRON* level in the respective AAV9-empty injected organ as control. All data are mean  $\pm$  S.D.;  $n=3-4$ . \* $P < 0.05$ ; \*\* $P < 0.01$ ; \*\*\* $P < 0.001$ ; \*\*\*\* $P < 0.0001$ ; Student's t-test.

**Table S1: Ct values of samples from figure 1 and 2.** (100-500 ng RNA was used for cDNA synthesis according to the concentration of the sample).

| <b>Experiment</b> | <b>Sample</b>        | <b>Ct value<br/>NRON</b> | <b>Ct value<br/>Housekeeper</b> |
|-------------------|----------------------|--------------------------|---------------------------------|
| <b>Figure 1a</b>  | chromatin associated | 27.89                    |                                 |
|                   | cytoplasmic fraction | 31.5                     |                                 |
|                   | Nuclear soluble      | 33                       |                                 |
| <b>Figure 1b</b>  | CMC                  | 29,46                    | 21,93                           |
|                   | CF                   | 30,65                    | 21,56                           |
|                   | EC                   | 32,13                    | 22,22                           |
| <b>Figure 1c</b>  | 2w Sham              | 24,155                   | 22,06                           |
|                   | 2w TAC               | 25,17                    | 21,44                           |
|                   | 4w Sham              | 29,65                    | 21,31                           |
|                   | 4w TAC               | 29,73                    | 21,45                           |
|                   | 6w Sham              | 29,79                    | 21,41                           |
|                   | 6w TAC               | 29,95                    | 21,37                           |
|                   | 8w Sham              | 27,79                    | 20,95                           |
|                   | 8w TAC               | 28                       | 20,84                           |
|                   | 13w Sham             | 30,16                    | 22,13                           |
| 13w TAC           | 30,15                | 21,07                    |                                 |
| <b>Figure 2a</b>  | AAV9-Empty           | 29,02                    | 10,75                           |
|                   | AAV9-NRON            | 27,11                    | 11,01                           |

**Table S2:** Echocardiography analysis after TAC surgery in AAV9-*NRON* injected mice.

|                           | Sham<br>AAV9-empty | Sham<br>AAV9- <i>NRON</i> | TAC<br>AAV9-empty | TAC<br>AAV9- <i>NRON</i> |
|---------------------------|--------------------|---------------------------|-------------------|--------------------------|
| Ejection fraction [%]     | 80.87 ± 8.66       | 72.3 ± 10.96              | 69.89 ± 13.79     | 64.85 ± 18.24            |
| Fractional shortening [%] | 49.56 ± 9.36       | 41.64 ± 8.66              | 39.84 ± 11.09     | 36.29 ± 12.3             |
| LV mass [mg]              | 138.3 ± 37.86      | 136.9 ± 13.26             | 165.2 ± 38.39     | 184 ± 33.14              |
| LV mass corr [mg]         | 110.6 ± 30.29      | 109.5 ± 10.61             | 132.2 ± 30.72     | 147.2 ± 26.51            |
| IVS;d [mm]                | 1.2 ± 0.12         | 1.16 ± 0.12               | 1.34 ± 0.26       | 1.2 ± 0.17               |
| IVS;s [mm]                | 1.79 ± 0.19        | 1.51 ± 0.17               | 1.7 ± 0.34        | 1.64 ± 0.21              |
| LVID;d [mm]               | 3.53 ± 0.29        | 3.8 ± 0.29                | 3.48 ± 0.3        | 3.75 ± 0.52              |
| LVID;s [mm]               | 1.76 ± 0.37        | 2.21 ± 0.53               | 2.08 ± 0.52       | 2.38 ± 0.79              |
| LVPW;d [mm]               | 0.86 ± 0.3         | 0.79 ± 0.16               | 1.06 ± 0.26       | 1.16 ± 0.23              |
| LVPW;s [mm]               | 1.27 ± 0.33        | 1.12 ± 0.31               | 1.42 ± 0.31       | 1.53 ± 0.37              |
| diameter;s [mm]           | 1.76 ± 0.4         | 2.25 ± 0.51               | 2.09 ± 0.5        | 2.14 ± 0.28              |
| diameter;d [mm]           | 3.48 ± 0.25        | 3.82 ± 0.23               | 3.44 ± 0.29       | 3.72 ± 0.5               |
| volume;s [uL]             | 9.96 ± 5.52        | 18.53 ± 10.75             | 15.55 ± 8.52      | 15.62 ± 5.25             |
| volume;d [uL]             | 50.69 ± 8.65       | 63.06 ± 8.92              | 49.39 ± 9.41      | 53.17 ± 7.07             |

Echocardiography parameters are displayed as mean ± SD. LV mass, left ventricular mass; LV mass corr, left ventricular mass corrected; IVS;d, intraventricular septum thickness in diastole; IVS;s, intraventricular septum thickness in systole ; LVID;d, left ventricular internal diameter in diastole; LVID;s, left ventricular internal diameter in systole; LVPW;d, left ventricular posterior wall thickness in diastole; LVPW;s, left ventricular posterior wall thickness in systole; diameter;s, systolic diameter; diameter;d, diastolic diameter; volume;s, systolic volume; volume;d, diastolic volume.

Table S3: Echocardiography analysis after TAC surgery in *NRON*-KO mice.

|                           | 2w Sham <i>NRON</i> +/+  | 2w Sham <i>NRON</i> -/-  | 2w TAC <i>NRON</i> +/+  | 2w TAC <i>NRON</i> -/-  |
|---------------------------|--------------------------|--------------------------|-------------------------|-------------------------|
| Ejection fraction [%]     | 53.97 ± 8.96             | 62.46 ± 14.63            | 49.3 ± 9.43             | 65.38 ± 9.88            |
| Fractional shortening [%] | 27.63 ± 5.54             | 34.27 ± 10.7             | 24.92 ± 6.15            | 35.77 ± 7.46            |
| LV mass [mg]              | 95.21 ± 15.88            | 105.5 ± 22.31            | 133.6 ± 28.02           | 115.1 ± 23.62           |
| LV mass corr [mg]         | 76.17 ± 12.7             | 84.4 ± 17.85             | 106.8 ± 22.41           | 92.05 ± 18.89           |
| IVS;d [mm]                | 0.79 ± 0.17              | 0.76 ± 0.08              | 0.93 ± 0.11             | 0.9 ± 0.13              |
| IVS;s [mm]                | 0.98 ± 0.21              | 0.96 ± 0.13              | 1.14 ± 0.15             | 1.07 ± 0.14             |
| LVID;d [mm]               | 3.72 ± 0.38              | 3.88 ± 0.38              | 4.04 ± 0.36             | 3.69 ± 0.28             |
| LVID;s [mm]               | 2.7 ± 0.41               | 2.61 ± 0.61              | 3.04 ± 0.41             | 2.39 ± 0.41             |
| LVPW;d [mm]               | 0.75 ± 0.21              | 0.79 ± 0.13              | 0.81 ± 0.14             | 0.82 ± 0.06             |
| LVPW;s [mm]               | 0.87 ± 0.18              | 0.96 ± 0.1               | 0.99 ± 0.14             | 1.12 ± 0.15             |
| diameter;s [mm]           | 2.71 ± 0.41              | 2.57 ± 0.59              | 3.07 ± 0.42             | 2.38 ± 0.42             |
| diameter;d [mm]           | 3.74 ± 0.34              | 3.87 ± 0.38              | 4.08 ± 0.36             | 3.68 ± 0.29             |
| volume;s [uL]             | 28.38 ± 10.44            | 25.76 ± 13.74            | 38.23 ± 11.69           | 20.75 ± 8.46            |
| volume;d [uL]             | 60.22 ± 12.7             | 65.58 ± 15.5             | 74.37 ± 15.6            | 57.96 ± 10.56           |
|                           | 6w Sham <i>NRON</i> +/+  | 6w Sham <i>NRON</i> -/-  | 6w TAC <i>NRON</i> +/+  | 6w TAC <i>NRON</i> -/-  |
| Ejection fraction [%]     | 52.04 ± 11.47            | 65.83 ± 6.01             | 42.54 ± 9.46            | 59.29 ± 8.93            |
| Fractional shortening [%] | 26.72 ± 7.34             | 35.93 ± 4.59             | 21.03 ± 5.44            | 31.24 ± 6.13            |
| LV mass [mg]              | 96.6 ± 11.9              | 97.31 ± 16.22            | 168.6 ± 28.69           | 121.9 ± 17.14           |
| LV mass corr [mg]         | 77.28 ± 9.52             | 77.84 ± 12.98            | 134.9 ± 22.95           | 97.55 ± 13.71           |
| IVS;d [mm]                | 0.75 ± 0.1               | 0.81 ± 0.13              | 1.04 ± 0.09             | 1 ± 0.15                |
| IVS;s [mm]                | 0.89 ± 0.13              | 0.99 ± 0.09              | 1.21 ± 0.14             | 1.11 ± 0.26             |
| LVID;d [mm]               | 4.05 ± 0.37              | 3.89 ± 0.32              | 4.38 ± 0.24             | 3.76 ± 0.36             |
| LVID;s [mm]               | 3 ± 0.57                 | 2.5 ± 0.22               | 3.48 ± 0.3              | 2.61 ± 0.42             |
| LVPW;d [mm]               | 0.64 ± 0.08              | 0.61 ± 0.1               | 0.86 ± 0.25             | 0.89 ± 0.2              |
| LVPW;s [mm]               | 0.87 ± 0.15              | 0.86 ± 0.15              | 0.99 ± 0.23             | 1.09 ± 0.21             |
| diameter;s [mm]           | 3.01 ± 0.54              | 2.5 ± 0.22               | 3.52 ± 0.31             | 2.61 ± 0.43             |
| diameter;d [mm]           | 4.08 ± 0.37              | 3.9 ± 0.32               | 4.45 ± 0.23             | 3.77 ± 0.37             |
| volume;s [uL]             | 36.93 ± 15.28            | 22.55 ± 4.8              | 52.05 ± 11.16           | 25.79 ± 10.46           |
| volume;d [uL]             | 74.17 ± 15.86            | 66.63 ± 12.76            | 90.41 ± 10.54           | 61.73 ± 14.83           |
|                           | 13w Sham <i>NRON</i> +/+ | 13w Sham <i>NRON</i> -/- | 13w TAC <i>NRON</i> +/+ | 13w TAC <i>NRON</i> -/- |
| Ejection fraction [%]     | 64.24 ± 7.56             | 60.43 ± 4.95             | 39.95 ± 7.97            | 44.05 ± 5.48            |
| Fractional shortening [%] | 34.92 ± 5.4              | 32 ± 3.48                | 19.54 ± 4.47            | 21.66 ± 3.16            |
| LV mass [mg]              | 89.58 ± 15.97            | 96.69 ± 15.81            | 192.5 ± 51.47           | 138.7 ± 36.69           |
| LV mass corr [mg]         | 71.66 ± 12.78            | 77.35 ± 12.65            | 154 ± 41.18             | 111 ± 29.36             |
| IVS;d [mm]                | 0.71 ± 0.07              | 0.74 ± 0.12              | 0.96 ± 0.16             | 0.9 ± 0.16              |
| IVS;s [mm]                | 0.93 ± 0.08              | 0.82 ± 0.07              | 1.13 ± 0.08             | 1.01 ± 0.19             |
| LVID;d [mm]               | 4.14 ± 0.34              | 3.99 ± 0.3               | 4.71 ± 0.46             | 4.14 ± 0.48             |
| LVID;s [mm]               | 2.72 ± 0.45              | 2.77 ± 0.17              | 3.8 ± 0.54              | 3.2 ± 0.43              |
| LVPW;d [mm]               | 0.6 ± 0.09               | 0.6 ± 0.06               | 0.95 ± 0.15             | 0.88 ± 0.18             |
| LVPW;s [mm]               | 0.88 ± 0.09              | 0.81 ± 0.11              | 1.05 ± 0.15             | 0.94 ± 0.27             |
| diameter;s [mm]           | 2.7 ± 0.42               | 2.79 ± 0.18              | 3.76 ± 0.5              | 3.3 ± 0.38              |
| diameter;d [mm]           | 4.13 ± 0.32              | 4.1 ± 0.2                | 4.66 ± 0.44             | 4.22 ± 0.45             |
| volume;s [uL]             | 28.1 ± 10.94             | 29.46 ± 4.58             | 61.83 ± 19.8            | 45.11 ± 13.16           |
| volume;d [uL]             | 76.37 ± 13.88            | 74.56 ± 8.68             | 101.5 ± 22.99           | 80.44 ± 20.9            |

**Table S3:**

Echocardiography parameters are displayed as mean  $\pm$  SD. LV mass, left ventricular mass; LV mass corr, left ventricular mass corrected; IVS;d, intraventricular septum thickness in diastole; IVS;s, intraventricular septum thickness in systole ; LVID;d, left ventricular internal diameter in diastole; LVID;s, left ventricular internal diameter in systole; LVPW;d, left ventricular posterior wall thickness in diastole; LVPW;s, left ventricular posterior wall thickness in systole; diameter;s, systolic diameter; diameter;d, diastolic diameter; volume;s, systolic volume; volume;d, diastolic volume.

Table S4: Top 100 deregulated mRNAs.

| Gene name     | Gene description                                                | Sham WT vs TAC WT |          | TAC WT vs TAC KO |          |
|---------------|-----------------------------------------------------------------|-------------------|----------|------------------|----------|
|               |                                                                 | fold change       | p-value  | fold change      | p-value  |
| Gm4544        | predicted gene 4544                                             | -1.75             | 1.74E-14 | 1.72             | 1.75E-14 |
| Tgfb2         | transforming growth factor, beta 2                              | 1.97              | 8.12E-39 | -1.61            | 6.70E-23 |
| Nppa          | natriuretic peptide type A                                      | 2.62              | 1.04E-40 | -1.56            | 6.84E-31 |
| Ppm1e         | protein phosphatase 1E (PP2C domain containing)                 | 1.55              | 1.76E-32 | -1.57            | 3.84E-30 |
| Syndig1       | synapse differentiation inducing 1                              | 2.64              | 5.05E-27 | -1.55            | 5.56E-11 |
| Scd4          | stearoyl-coenzyme A desaturase 4                                | -1.51             | 9.55E-12 | 1.44             | 2.35E-09 |
| Aldob         | aldolase B, fructose-bisphosphate                               | -1.87             | 6.34E-14 | 1.42             | 1.50E-09 |
| Dok5          | docking protein 5                                               | 1.36              | 2.34E-11 | -1.32            | 8.89E-10 |
| Acot1         | acyl-CoA thioesterase 1                                         | -1.38             | 2.23E-17 | 1.31             | 2.04E-14 |
| Gm13054       | predicted gene 13054                                            | 2.36              | 2.28E-27 | -1.26            | 1.09E-08 |
| Ankrd1        | ankyrin repeat domain 1 (cardiac muscle)                        | 2.04              | 2.12E-23 | -1.24            | 3.15E-15 |
| Lad1          | ladinin                                                         | -1.23             | 4.08E-10 | 1.24             | 8.93E-10 |
| Gm40841       | predicted gene, 40841                                           | -1.94             | 1.50E-15 | 1.21             | 6.43E-07 |
| Lgi1          | leucine-rich repeat LGI family, member 1                        | -1.23             | 7.04E-12 | 1.21             | 1.04E-11 |
| Nuak1         | NUAK family, SNF1-like kinase, 1                                | 1.45              | 1.58E-41 | -1.20            | 2.85E-17 |
| Mybl1         | myeloblastosis oncogene-like 1                                  | 1.18              | 1.07E-10 | -1.23            | 1.73E-11 |
| Apold1        | apolipoprotein L domain containing 1                            | 1.20              | 5.70E-16 | -1.18            | 3.31E-14 |
| Frat1         | frequently rearranged in advanced T cell lymphomas              | -1.38             | 1.74E-10 | 1.18             | 8.46E-08 |
| Lrrc4b        | leucine rich repeat containing 4B                               | -1.18             | 7.02E-18 | 1.19             | 7.75E-14 |
| Gm24474       | predicted gene, 24474                                           | -1.19             | 3.21E-08 | 1.18             | 4.30E-08 |
| Gm19277       | predicted gene, 19277                                           | -1.41             | 1.01E-08 | 1.17             | 1.68E-06 |
| Ctgf          | connective tissue growth factor                                 | 2.50              | 1.60E-78 | -1.14            | 3.47E-07 |
| Gm29773       | predicted gene, 29773                                           | 3.23              | 4.70E-42 | -1.13            | 8.56E-07 |
| Gpr3          | G-protein coupled receptor 3                                    | 1.21              | 1.86E-06 | -1.13            | 2.04E-06 |
| Grip1         | glutamate receptor interacting protein 1                        | 1.49              | 1.39E-09 | -1.11            | 1.43E-06 |
| Angpt1        | angiopoietin 1                                                  | -1.91             | 6.35E-35 | 1.11             | 5.61E-12 |
| Slc22a4       | solute carrier family 22 (organic cation transporter), member 4 | 1.51              | 3.57E-49 | -1.11            | 4.88E-21 |
| Edn3          | endothelin 3                                                    | 1.74              | 3.79E-23 | -1.10            | 2.56E-09 |
| Hmgcs2        | 3-hydroxy-3-methylglutaryl-Coenzyme A synthase 2                | -1.09             | 1.30E-05 | 1.22             | 7.54E-09 |
| AC165271.1    | novel transcript, antisense to Kcnj6                            | 2.08              | 1.03E-24 | -1.09            | 2.64E-08 |
| Tg            | thyroglobulin                                                   | -1.09             | 5.54E-07 | 1.32             | 2.15E-10 |
| Hspa1a        | heat shock protein 1A                                           | 1.84              | 3.10E-13 | -1.07            | 1.25E-05 |
| Pou3f1        | POU domain, class 3, transcription factor 1                     | 1.34              | 7.97E-09 | -1.06            | 3.63E-06 |
| Wnk4          | WNK lysine deficient protein kinase 4                           | -1.06             | 6.04E-12 | 1.13             | 1.08E-11 |
| Hsp90aa1      | heat shock protein 90, alpha (cytosolic), class A member 1      | 1.06              | 1.47E-23 | -1.06            | 4.39E-15 |
| A730036117Rik | RIKEN cDNA A730036117 gene                                      | 1.70              | 2.50E-12 | -1.05            | 2.96E-06 |
| Hbegf         | heparin-binding EGF-like growth factor                          | 1.75              | 1.28E-30 | -1.05            | 1.68E-06 |
| 2310039L15Rik | RIKEN cDNA 2310039L15 gene                                      | -1.03             | 1.11E-10 | 1.30             | 1.13E-17 |
| Uck11os       | uridine-cytidine kinase 1-like 1, opposite strand               | -1.61             | 5.41E-15 | 1.03             | 2.19E-05 |
| Nmrk2         | nicotinamide riboside kinase 2                                  | 1.69              | 3.03E-11 | -1.02            | 3.05E-05 |
| Tent5a        | terminal nucleotidyltransferase 5A                              | 1.09              | 1.41E-20 | -1.01            | 1.27E-14 |
| Shisa6        | shisa family member 6                                           | -1.01             | 9.54E-06 | 1.10             | 7.58E-07 |
| Fbp2          | fructose bisphosphatase 2                                       | -1.03             | 1.47E-12 | 1.01             | 2.70E-10 |
| Synpo2l       | synaptopodin 2-like                                             | 1.70              | 3.38E-17 | -1.00            | 1.71E-06 |
| Shisa3        | shisa family member 3                                           | 1.00              | 4.67E-07 | -1.07            | 1.15E-06 |
| Gal3st3       | galactose-3-O-sulfotransferase 3                                | -1.35             | 1.51E-29 | 0.99             | 2.38E-09 |
| Clec18a       | C-type lectin domain family 18, member A                        | -1.37             | 8.92E-09 | 0.99             | 2.19E-05 |
| Sox9          | SRY (sex determining region Y)-box 9                            | 1.41              | 4.79E-23 | -0.98            | 5.43E-10 |
| Serpinb1c     | serine (or cysteine) peptidase inhibitor, clade B, member 1c    | 3.11              | 7.13E-52 | -0.98            | 4.77E-05 |
| Ripor2        | RHO family interacting cell polarization regulator 2            | -0.97             | 1.87E-11 | 1.12             | 1.15E-11 |
| Nr4a3         | nuclear receptor subfamily 4, group A, member 3                 | 1.38              | 1.67E-18 | -0.97            | 2.19E-08 |
| Resf1         | retroelement silencing factor 1                                 | 1.38              | 1.33E-35 | -0.97            | 3.18E-08 |
| Enah          | ENAH actin regulator                                            | 1.44              | 7.61E-55 | -0.97            | 1.24E-14 |
| Gm10635       | predicted gene 10635                                            | -1.75             | 6.89E-16 | 0.96             | 2.20E-05 |
| Car9          | carbonic anhydrase 9                                            | 1.21              | 1.79E-06 | -0.96            | 8.16E-05 |
| Clcn1         | chloride channel, voltage-sensitive 1                           | -1.68             | 1.41E-32 | 0.96             | 7.23E-10 |
| Xirp2         | xin actin-binding repeat containing 2                           | 1.75              | 1.97E-40 | -0.95            | 1.55E-09 |

Table S4

|               |                                                                                                |       |          |       |          |
|---------------|------------------------------------------------------------------------------------------------|-------|----------|-------|----------|
| Efnb3         | ephrin B3                                                                                      | -1.13 | 7.32E-18 | 0.95  | 4.56E-14 |
| Adcy8         | adenylate cyclase 8                                                                            | -0.95 | 5.46E-05 | 0.95  | 4.18E-05 |
| Abra          | actin-binding Rho activating protein                                                           | 2.10  | 6.29E-52 | -0.95 | 2.17E-05 |
| Klhl33        | kelch-like 33                                                                                  | -1.69 | 1.08E-31 | 0.95  | 7.74E-08 |
| Mrgprh        | MAS-related GPR, member H                                                                      | -1.41 | 3.44E-17 | 0.94  | 3.08E-06 |
| Hsbp111       | heat shock factor binding protein 1-like 1                                                     | -0.93 | 5.77E-06 | 0.96  | 1.48E-06 |
| Nr4a1         | nuclear receptor subfamily 4, group A, member 1                                                | 0.93  | 1.20E-04 | -0.98 | 3.19E-06 |
| Gm45457       | predicted gene 45457                                                                           | 0.93  | 2.01E-06 | -1.34 | 2.96E-13 |
| Gm43660       | predicted gene 43660                                                                           | 1.15  | 7.64E-15 | -0.93 | 2.40E-06 |
| Otud1         | OTU domain containing 1                                                                        | 1.21  | 1.25E-09 | -0.92 | 9.88E-05 |
| Acta1         | actin, alpha 1, skeletal muscle                                                                | 3.02  | 2.76E-45 | -0.92 | 3.57E-10 |
| Gm11992       | predicted gene 11992                                                                           | -0.92 | 2.90E-04 | 1.27  | 1.72E-07 |
| Efemp1        | epidermal growth factor-containing fibulin-like extracellular matrix protein 1                 | -1.11 | 4.51E-10 | 0.92  | 1.14E-07 |
| 2310016G11Rik | RIKEN cDNA 2310016G11 gene                                                                     | -1.27 | 2.72E-07 | 0.91  | 1.65E-04 |
| Ucp3          | uncoupling protein 3 (mitochondrial, proton carrier)                                           | -0.90 | 2.06E-04 | 1.28  | 7.57E-14 |
| Gcnt1         | glucosaminyl (N-acetyl) transferase 1, core 2                                                  | 1.10  | 2.42E-15 | -0.89 | 1.23E-10 |
| Xirp1         | xin actin-binding repeat containing 1                                                          | 1.38  | 4.10E-54 | -0.89 | 7.72E-11 |
| P3h2          | proyl 3-hydroxylase 2                                                                          | 1.28  | 2.90E-16 | -0.89 | 1.94E-08 |
| Alox5         | arachidonate 5-lipoxygenase                                                                    | -0.89 | 2.83E-07 | 0.96  | 8.92E-10 |
| Lman1l        | lectin, mannose-binding 1 like                                                                 | 2.75  | 4.36E-73 | -0.89 | 1.13E-06 |
| Cabcoco1      | ciliary associated calcium binding coiled-coil 1                                               | -1.00 | 1.17E-11 | 0.89  | 6.25E-09 |
| Cadm4         | cell adhesion molecule 4                                                                       | -0.89 | 2.06E-16 | 1.16  | 1.73E-23 |
| Gm8113        | predicted gene 8113                                                                            | -1.16 | 1.13E-06 | 0.88  | 2.14E-04 |
| Tnnt3         | troponin T3, skeletal, fast                                                                    | 1.01  | 7.14E-05 | -0.88 | 2.95E-04 |
| Gm36569       | predicted gene, 36569                                                                          | 1.07  | 2.80E-06 | -0.88 | 1.98E-04 |
| Etv4          | ets variant 4                                                                                  | 1.31  | 2.08E-08 | -0.88 | 7.25E-05 |
| Fam198b       | family with sequence similarity 198, member B                                                  | 0.88  | 2.18E-15 | -1.05 | 2.53E-19 |
| Gdf15         | growth differentiation factor 15                                                               | 2.30  | 1.76E-21 | -0.88 | 2.61E-04 |
| Gpr22         | G protein-coupled receptor 22                                                                  | -1.76 | 4.38E-29 | 0.88  | 9.30E-07 |
| Hspa1b        | heat shock protein 1B                                                                          | 1.83  | 3.55E-14 | -0.87 | 3.47E-04 |
| Klhl38        | kelch-like 38                                                                                  | -0.87 | 3.66E-04 | 1.24  | 4.07E-08 |
| Cplx3         | complexin 3                                                                                    | 1.42  | 1.09E-08 | -0.87 | 3.36E-04 |
| Cngeb3        | cyclic nucleotide gated channel beta 3                                                         | -0.87 | 2.12E-04 | 1.33  | 5.73E-09 |
| Gm11382       | predicted pseudogene 11382                                                                     | 1.53  | 1.85E-09 | -0.86 | 2.97E-04 |
| P4ha1         | procollagen-proline, 2-oxoglutarate 4-dioxygenase (proline 4-hydroxylase), alpha 1 polypeptide | 0.86  | 5.14E-18 | -0.95 | 2.80E-17 |
| Gm31663       | predicted gene, 31663                                                                          | -0.86 | 2.89E-06 | 1.02  | 1.75E-08 |
| Stc1          | stanniocalcin 1                                                                                | 0.88  | 7.35E-09 | -0.86 | 1.21E-06 |
| Bcl2          | B cell leukemia/lymphoma 2                                                                     | 0.86  | 3.51E-14 | -1.07 | 6.39E-25 |
| Kcnv2         | potassium channel, subfamily V, member 2                                                       | -0.96 | 5.19E-05 | 0.85  | 2.76E-05 |
| Retnla        | resistin like alpha                                                                            | -1.38 | 2.91E-09 | 0.85  | 2.65E-04 |
| Nppb          | natriuretic peptide type B                                                                     | 2.15  | 1.55E-27 | -0.85 | 7.54E-05 |
| Hspa1l        | heat shock protein 1-like                                                                      | 1.36  | 1.15E-38 | -0.85 | 1.23E-13 |
| Fhl1          | four and a half LIM domains 1                                                                  | 1.22  | 5.56E-07 | -0.84 | 3.40E-04 |

Top 100 of significantly different mRNAs with reverse regulation between the three groups (Sham WT, TAC WT and TAC KO) and a minimum FC of 1.5 are displayed. Fold change and p-value is given for Sham WT vs TAC WT and TAC WT vs TAC KO. One-way Anova.



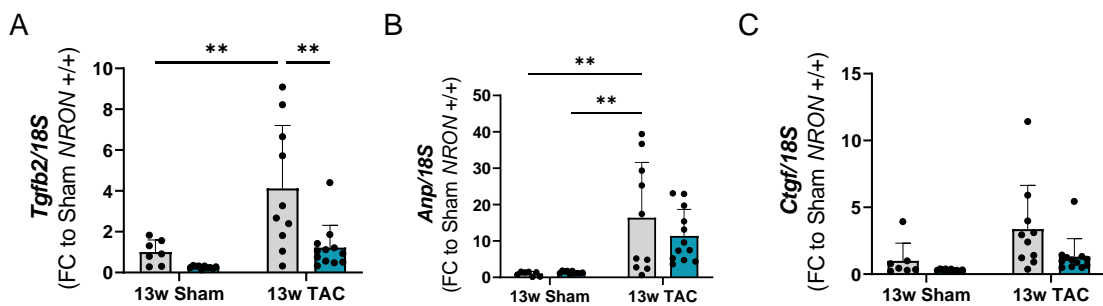

**Figure S2: Validation of targets from transcriptomic data.** RNA level of (A) *Tgfb2*, (B) *Anp* and (C) *Ctgf* mRNA after 13 weeks of surgery was measured by qPCR and normalized to 18S RNA. All data are mean  $\pm$  S.D.; n=7-12. \*P<0.05; \*\*P<0.01; \*\*\*P<0.001; \*\*\*\*P<0.0001. Two-way ANOVA with Tukey's multiple comparisons test

**Table S5:** Primer sequences used for gene expression analysis.

| <b>Gene</b>    | <b>Forward primer sequence</b> | <b>Reverse primer sequence</b> |
|----------------|--------------------------------|--------------------------------|
| <i>Gapdh</i>   | 5'TTCACCACCATGGAGAAGGC3'       | 5'GGCATGGACTGTGGTCATGA3'       |
| <i>ActB</i>    | 5'ATCAAGATCATTGCTCCTCCTG3'     | 5'AGGGTGTAACACGCAGCTCA3'       |
| <i>18S</i>     | 5'GTAACCCGTTGAACCCATT3'        | 5'CCATCCAATCGGTAGTAGCG3'       |
| <i>Nron</i>    | 5'AATGGTGCAGCTCGGATTAC3'       | 5'GGGAAGGGTTAAGGTGGTA3'        |
| <i>Bnp</i>     | 5'CTGAAGGTGCTGTCCCAGAT3'       | 5'GTTCTTTTGTGAGGCCTTGG3'       |
| <i>Mcip1.4</i> | 5'AGGGACTTTAGCTACAATTT3'       | 5'TATGTTCTGAAGAGGGATT3'        |
| <i>Xist</i>    | 5'TCATCCGCTTGC GTTCATAG3'      | 5'GAGATCAGTGCTGGCTAAATCAGA3'   |
